# Supplementary material
Source: Springer Nature journal article supplement (https://www.springermedizin.de/resource/supplementary/12933_2012_481_MOESM1_ESM.pdf/9538676)

### Inflammation

### Fibrin

### Neointimal Immaturity

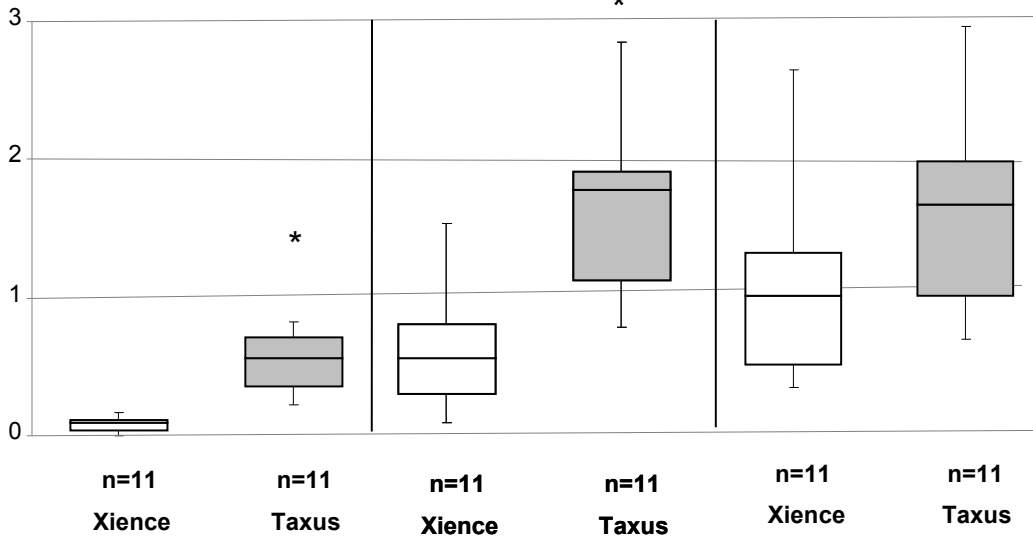

Supplement: MOESM1 [file 9538676]
